# Supplementary material
Source: MDPI journal article supplement (https://www.mdpi.com/1424-8247/17/3/381)
Supplement: s1 [file s1]

**Table S1:** Eye Opening and Somatic Growth

| Group                             | Eye Opening at P14 (both eyes) | % Change in Body Weight from P0 | % Change in Body Length from P0 |
|-----------------------------------|--------------------------------|---------------------------------|---------------------------------|
| <i>Room Air (RA):</i>             |                                |                                 |                                 |
| Olive Oil                         | 7 (39%)                        | 513.0±13.5                      | 88.8±1.5                        |
| CoQ10                             | 7 (39%)                        | 479.7±18.8                      | 87.6±1.8                        |
| Fish Oil                          | 16 (89%)**                     | 422.7±13.8**                    | 99.0±2.5*                       |
| nGSH                              | 16 (89%)**                     | 563.6±17.1                      | 114.2±3.8**                     |
| CoQ10+Fish Oil                    | 16 (89%)**                     | 456.2±21.2                      | 93.8±2.7                        |
| <i>Intermittent Hypoxia (IH):</i> |                                |                                 |                                 |
| Olive Oil                         | 0 (0%)§§                       | 319.9±12.3§§                    | 66.2±2.2§§                      |
| CoQ10                             | 6 (33%)#                       | 304.5±10.3§§                    | 86.7±2.5##                      |
| Fish Oil                          | 10 (56%)##§                    | 499.4±19.3##§§                  | 106.9±1.9##§                    |
| nGSH                              | 6 (33%)##§§                    | 390.8±18.6##§§                  | 92.6±1.8##§§                    |
| CoQ10+Fish Oil                    | 15 (83%)##                     | 398.9±13.1##§                   | 84.9±1.7##§§                    |

CoQ10 (Coenzyme Q10), nGSH (glutathione nanoparticles), P0 (birth, postnatal day 0). Data are mean±SEM (n=18 rats per group). \*p<0.05, \*\*p<0.01 vs Olive Oil in RA; #p<0.05, ##p<0.01 vs Olive Oil in IH. Eye opening was analyzed using 2-sided Fisher's exact test. % change in body weight and length were analyzed using one-way ANOVA with Dunnett's post hoc multiple comparison test for comparison among the treatment groups in each oxygen environment and comparison between RA and IH was analyzed using unpaired t-test (§p<0.05, §§p<0.01).

**Figure S1 – Experimental Design**

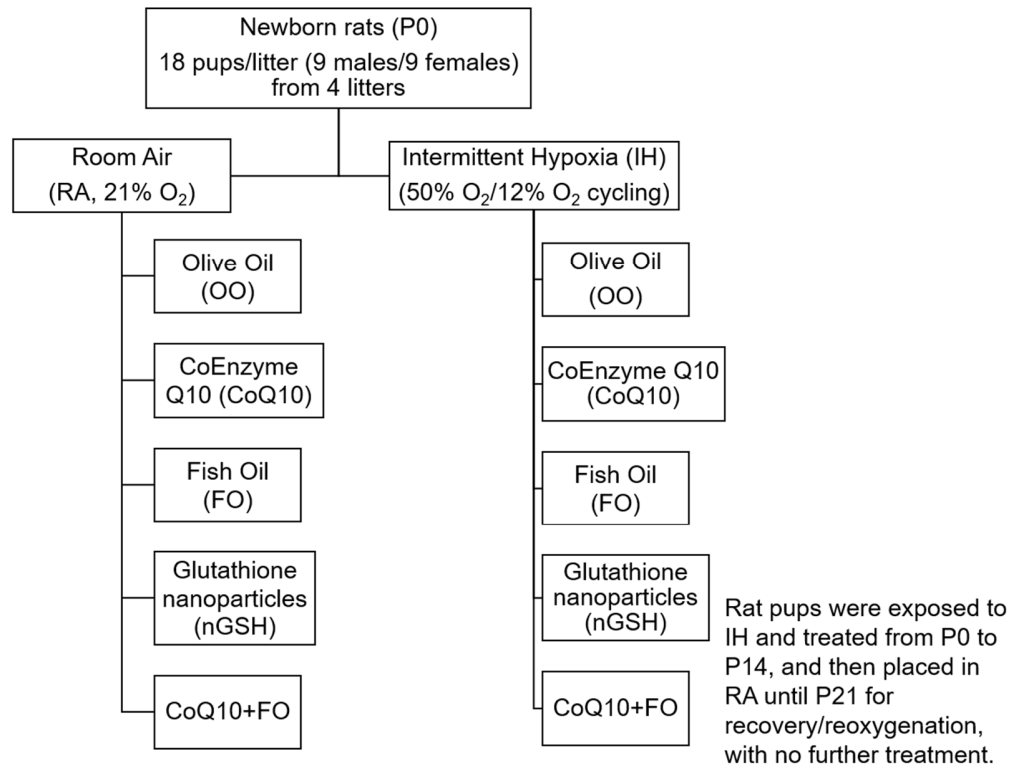

## Figure S2 – GFAP

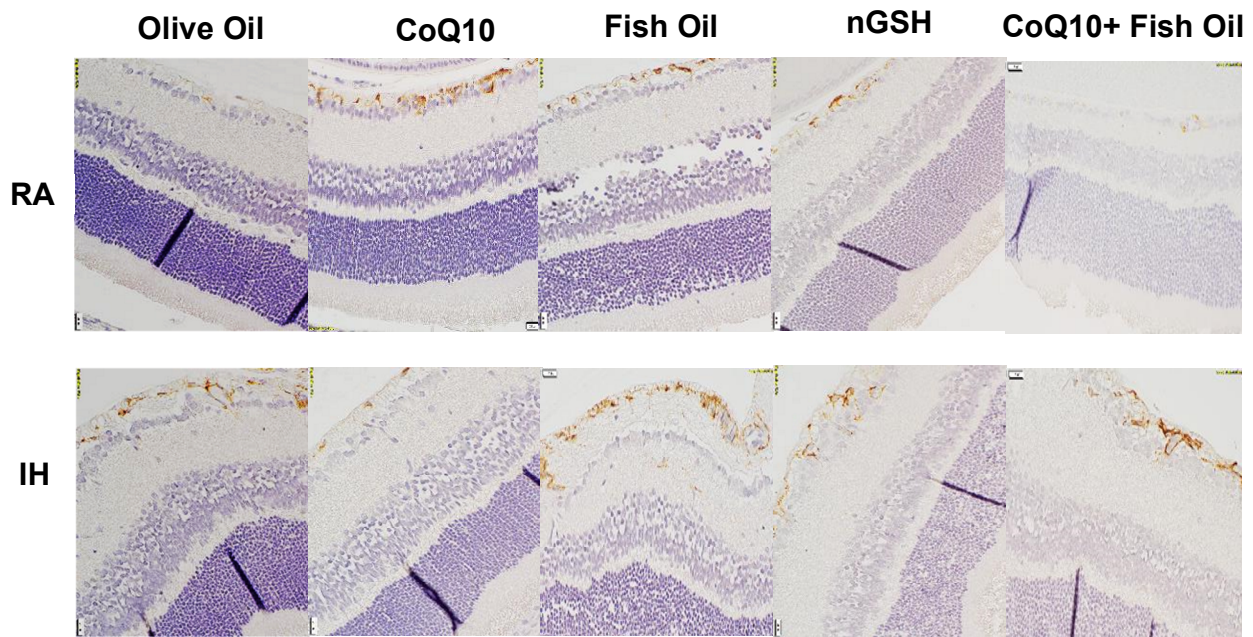

**Figure S2.** Representative immunoreactivity of GFAP (brown) in the retinal layers at P21. RA-exposed retinas are represented in the upper panels and IH-exposed retinas are represented in the lower panels. Images are 40X magnification (scale bar is 20  $\mu$ M). GFAP was present only in the NFL/GCL layer.

### Figure S3 - HIF<sub>1α</sub>

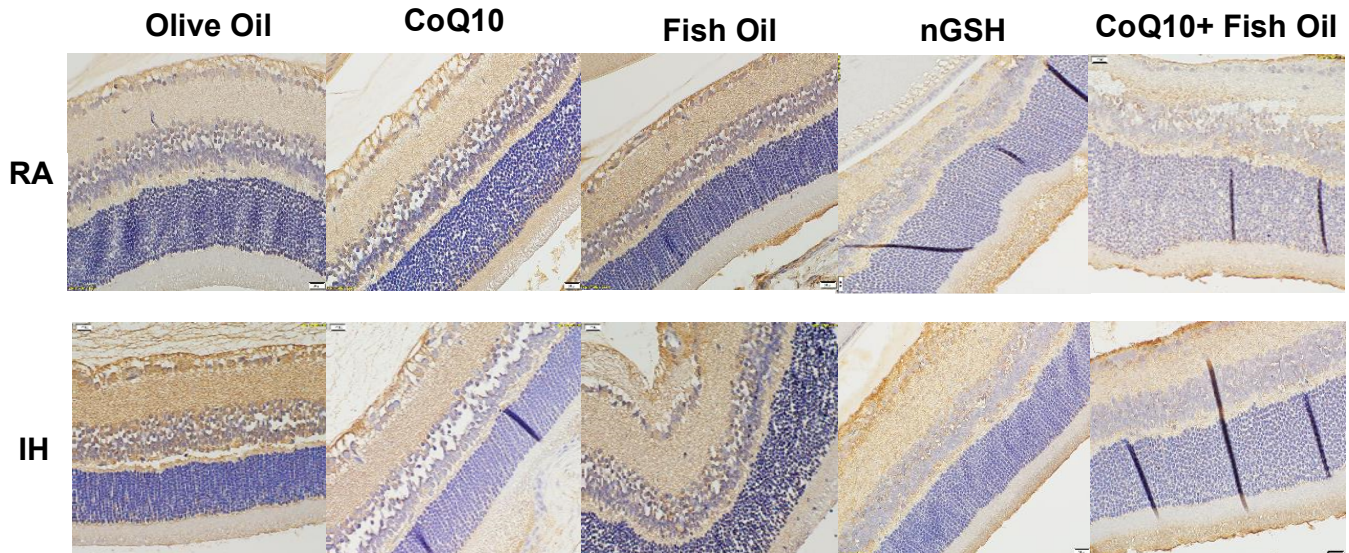

**Figure S3.** Representative immunoreactivity of HIF<sub>1α</sub> (brown) in the retinal layers at P21. RA-exposed retinas are represented in the upper panels and IH-exposed retinas are represented in the lower panels. Images are 40X magnification (scale bar is 20  $\mu$ M).
